# Supplementary material for: NK cells CD56bright and CD56dim subset cytokine loss and exhaustion is associated with impaired survival in myeloma
Source: PubMed Central journal article supplement — Blood Adv. 2022 Sep 2;6(17):5152–9. doi: 10.1182/bloodadvances.2022007905 (PMC9631618; doi:10.1182/bloodadvances.2022007905), 2022-09-02
Supplement: advancesADV2022007905-suppl1.pdf [file advancesADV2022007905-suppl1.pdf]

## Supplementary Data

### Supplementary methods

#### Cytotoxicity assay

The following flow cytometry antibodies were obtained from eBiosciences, anti-CD3 PerCP, anti-CD107a APC, anti-CD16 AF700, anti-IFN $\gamma$  BV421, Annexin V BV711, anti-CD56 PE, anti-CD8 PE-TxR and anti-TNF $\alpha$  PE-Cy7.

CFSE labelled target cells (K562 cell line, U266 cell line) were incubated in a 1:1 ratio with BMDCs for 5 hours with protein transport inhibitor (2 $\mu$ l/ml, e-biosciences) added for the final 4 hours. Following incubation cells were stained with zombie yellow viability dye (Biolegend) as per manufacturer's protocol. For cell surface staining, cells were washed and re-suspended in a pre-titrated antibody mastermix for 20 minutes. For intracellular staining, cells were washed and incubated in lysis buffer (Biolegend) for 10 minutes then permeabilisation solution (BD) for 30 minutes. Fully stained samples were washed and re-suspended in FACS buffer (phosphate buffered saline supplemented with 2% FCS (Life Tech)). Data was acquired using a Fortessa 2 cytometer (BD Biosciences).

#### Supplementary data tables

**Table 1.** Mass cytometry antibody panel

| Antigen | Clone  | Metal Tag | Source   |
|---------|--------|-----------|----------|
| CD45    | HI30   | 89Y       | Fluidigm |
| CD3     | UCHT1  | 154Sm     | Fluidigm |
| CD4     | RPA-T4 | 145Nd     | Fluidigm |

|               |           |       |           |
|---------------|-----------|-------|-----------|
| CD8a          | RPA-T8    | 146Nd | Fluidigm  |
| CD56          | B159      | 155Gd | Fluidigm  |
| CD16          | 3G8       | 209Bi | Fluidigm  |
| CD19          | HIB19     | 142Nd | Fluidigm  |
| CD20          | 2H7       | 147Sm | Fluidigm  |
| CD38          | HIT2      | 161Dy | Biolegend |
| CD138         | DL101     | 168Er | Fluidigm  |
| CD45RA        | HI100     | 169Tm | Fluidigm  |
| CD197 (CCR7)  | G043H7    | 159Tb | Fluidigm  |
| CD27          | L128      | 167Er | Fluidigm  |
| CD28          | CD28.2    | 160Gd | Fluidigm  |
| CD25          | 2A3       | 149Sm | Fluidigm  |
| CD127         | A019D5    | 176Yb | Fluidigm  |
| FoxP3         | PCH101    | 162Dy | Fluidigm  |
| HLA-DR        | L243      | 174Yb | Fluidigm  |
| CD244 (2B4)   | C1.7      | 164Dy | Biolegend |
| CD134 (OX40)  | ACT35     | 158Gd | Fluidigm  |
| CD314 (NKG2D) | ON72      | 166Er | Fluidigm  |
| CD226 (DNAM1) | DX11      | 171Yb | Fluidigm  |
| CD223 (LAG3)  | 874501    | 150Nd | Fluidigm  |
| CD366 (TIM3)  | F38-2E2   | 156Gd | Biolegend |
| CD152 (CTLA4) | 14D3      | 170Er | Fluidigm  |
| CD279 (PD1)   | EH12.2H7  | 172Yb | Biolegend |
| CD274 (PDL1)  | 29E.2A3   | 143Nd | Biolegend |
| Granzyme      | GB11      | 173Yb | Fluidigm  |
| Perforin      | B-D48     | 175Lu | Fluidigm  |
| CD107a        | H4A3      | 151Eu | Fluidigm  |
| IFN $\gamma$  | B27       | 165Ho | Fluidigm  |
| TNF $\alpha$  | Mab11     | 152Sm | Fluidigm  |
| IL2           | Mq1-17H12 | 148Nd | Biolegend |
| IL10          | JES3-9D7  | 141Pr | Biolegend |
| TGFB          | TW4-6H10  | 163Dy | Fluidigm  |
| Ki67          | Ki-67     | 153Eu | Biolegend |

|                  |  |           |          |
|------------------|--|-----------|----------|
| Cisplatin        |  | 198Pt     | Fluidigm |
| DNA Intercalator |  | 191/193Ir | Fluidigm |

**Supplementary Figure**

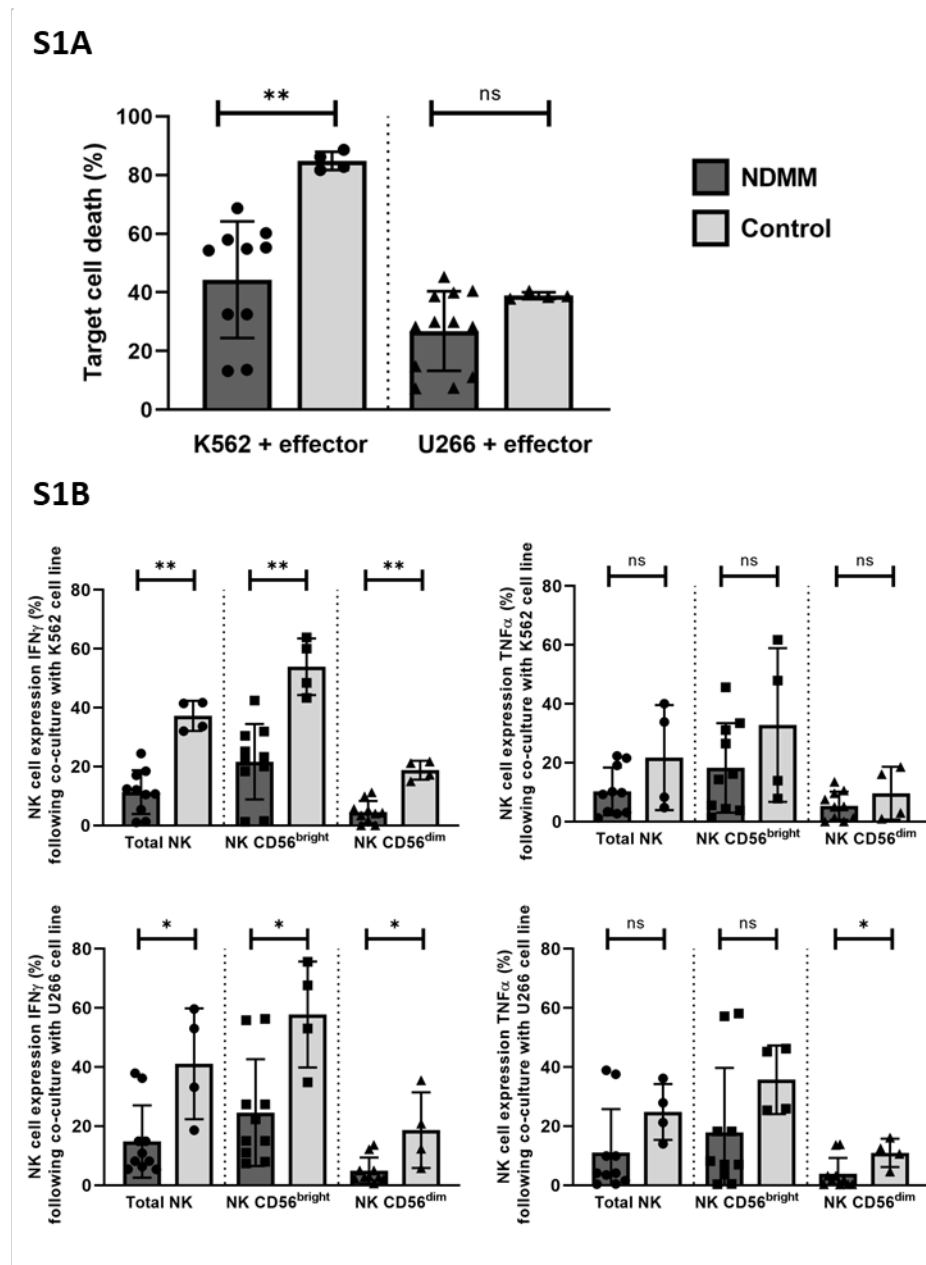

**Supplementary Figure 1: Cytotoxicity assay.** (A) Target cell death following incubation with bone marrow derived effector cells. (B) NK cell cytokine expression following co-culture with target cells.
